# Supplementary material for: Common Genetic Variants Associated with Sudden Cardiac Death: The FinSCDgen Study
Source: PubMed Central journal article supplement (PMC3402479; doi:10.1371/journal.pone.0041675), 2012-07-23
Supplement: pone.0041675.s002.pdf [file pone.0041675.s002.pdf]

**Table S1. Follow-up time and clinical characteristics of the prospective study cohorts.**

|                                        | <b>FINRISK<br/>1992</b> | <b>FINRISK<br/>1997</b> | <b>FINRISK<br/>2002</b> | <b>Health<br/>2000</b> |
|----------------------------------------|-------------------------|-------------------------|-------------------------|------------------------|
| Follow-up time, years, median (IQR)    | 16.8 (0.10)             | 11.8 (0.11)             | 6.8 (0.11)              | 8.0 (0.31)             |
| Person-years at risk                   | 87991                   | 87148                   | 55888                   | 48731                  |
| Geographic region, East, n (%)         | 2648 (48.9)             | 3073 (39.6)             | 2623 (31.6)             | 1936 (29.8)            |
| HDL/TC ratio, mean $\pm$ SD            | 0.26 $\pm$ 0.079        | 0.26 $\pm$ 0.078        | 0.28 $\pm$ 0.085        | 0.23 $\pm$ 0.074       |
| Systolic BP, mmHg, mean $\pm$ SD       | 135.5 $\pm$ 19.5        | 136.0 $\pm$ 20.0        | 135.0 $\pm$ 20.0        | 134.4 $\pm$ 20.6       |
| Prevalent diabetes, n (%)              | 201 (3.7)               | 471 (6.1)               | 473 (5.7)               | 532 (8.2)              |
| BMI, kg/m <sup>2</sup> , mean $\pm$ SD | 26.1 $\pm$ 4.5          | 26.7 $\pm$ 4.6          | 26.9 $\pm$ 4.7          | 27.0 $\pm$ 4.7         |
| Current smoker, n (%)                  | 1512 (27.9)             | 1809 (23.3)             | 2142 (25.8)             | 1842 (28.4)            |
| Former smoker, n (%)                   | 1010 (18.6)             | 1727 (22.3)             | 1806 (21.8)             | 1337 (20.6)            |
| Low physical activity, n (%)           | 1319 (24.6)             | 1754 (22.6)             | 1892 (22.8)             | 1619 (25.0)            |
| Prevalent CHD, n (%)                   | 68 (1.3)                | 201 (2.6)               | 213 (2.6)               | 269 (4.1)              |
| QT-prolonging drug*, n (%)             | NA <sup>†</sup>         | 405 (5.2)               | 474 (5.7)               | 551 (8.5)              |
| Digoxin, n (%)                         | NA <sup>†</sup>         | 90 (1.2)                | 35 (0.4)                | 88 (1.4)               |

BMI = body mass index, BP = blood pressure, CHD = coronary heart disease, HDL = high-density lipoprotein cholesterol, IQR = interquartile range, SD = standard deviation, TC = total cholesterol.

\*Any of the QT-prolonging drug classes (Table S3).

<sup>†</sup>Pharmacy data available only after 1995.
