# Supplementary material for: Common Genetic Variants Associated with Sudden Cardiac Death: The FinSCDgen Study
Source: PubMed Central journal article supplement (PMC3402479; doi:10.1371/journal.pone.0041675), 2012-07-23
Supplement: pone.0041675.s003.pdf [file pone.0041675.s003.pdf]

**Table S2. Causes of death in each study cohort.**

| <b>Cause of death</b> | <b>FINRISK<br/>1992</b> | <b>FINRISK<br/>1997</b> | <b>FINRISK<br/>2002</b> | <b>Health<br/>2000</b> | <b>HSDS</b> | <b>TASTY</b> | <b>All<br/>cohorts</b> |
|-----------------------|-------------------------|-------------------------|-------------------------|------------------------|-------------|--------------|------------------------|
| Probable SCD          | 109                     | 143                     | 59                      | 82                     | 114         | 96           | 603                    |
| Possible SCD          | 20                      | 35                      | 16                      | 30                     | 3           | 9            | 113                    |
| Unlikely SCD          | 344                     | 471                     | 174                     | 337                    | 178         | 287          | 1791                   |
| Unknown               | 17                      | 58                      | 7                       | 20                     | 2           | 5            | 109                    |
| <b>Total</b>          | <b>490</b>              | <b>707</b>              | <b>256</b>              | <b>469</b>             | <b>297</b>  | <b>397</b>   | <b>2616</b>            |

HSDS = The Helsinki Sudden Death Study, SCD = sudden cardiac death, TASTY = The Tampere Autopsy Study.
