# Supplementary material for: Common Genetic Variants Associated with Sudden Cardiac Death: The FinSCDgen Study
Source: PubMed Central journal article supplement (PMC3402479; doi:10.1371/journal.pone.0041675), 2012-07-23
Supplement: pone.0041675.s005.pdf [file pone.0041675.s005.pdf]

**Table S4. SNPs selected for genotyping.**

| SNP                                           | Chr | Position    | Nearest gene         | SNP function            | Trait                           |
|-----------------------------------------------|-----|-------------|----------------------|-------------------------|---------------------------------|
| rs846111                                      | 1p  | 6,201,957   | <i>RNF207</i>        | G603A                   | QT interval [1]                 |
| rs2880058                                     | 1q  | 160,281,256 | <i>NOS1AP</i>        | Upstream                | QT interval [2,3]               |
| rs12036340 ( $r^2 = 0.94$<br>with rs12143842) | 1q  | 160,282,364 | <i>NOS1AP</i>        | Upstream                | QT interval [1,4]               |
| rs12143842                                    | 1q  | 160,300,514 | <i>NOS1AP</i>        | Upstream                | QT interval [1,4,5]             |
| rs10919071                                    | 1q  | 167,366,107 | <i>ATP1B1</i>        | Intronic                | QT interval [1,4]               |
| rs1805126                                     | 3p  | 38,567,410  | <i>SCN5A</i>         | D1819D                  | QT, QRS and PR interval [1,6]   |
| rs12053903                                    | 3p  | 38,568,397  | <i>SCN5A</i>         | Intronic                | QT, QRS and PR interval [1,4,6] |
| rs41312391                                    | 3p  | 38,573,610  | <i>SCN5A</i>         | Intronic                | QT interval [7,8]               |
| rs3922844                                     | 3p  | 38,599,257  | <i>SCN5A</i>         | Intronic                | PR interval [9]                 |
| rs6599219                                     | 3p  | 38,612,714  | <i>SCN5A</i>         | Intronic                | PR interval*                    |
| rs7372712                                     | 3p  | 38,661,196  | <i>SCN5A</i>         | Intronic                | PR interval*                    |
| rs2200733                                     | 4q  | 111,929,618 | <i>PITX2</i>         | Upstream                | atrial fibrillation [10]        |
| rs10033464                                    | 4q  | 111,940,210 | <i>PITX2</i>         | Upstream                | atrial fibrillation [10]        |
| rs1042714                                     | 5q  | 148,186,666 | <i>ADRB2</i>         | Q27E                    | SCD [11]                        |
| rs12210810                                    | 6q  | 118,759,897 | <i>SLC35F1/PLN</i>   | Downstream/<br>upstream | QT interval [1]                 |
| rs11756440 ( $r^2 = 1.0$<br>with rs11756438)  | 6q  | 119,100,335 | <i>C6orf204/PLN</i>  | Intronic/<br>downstream | QT interval [4]                 |
| rs4725982                                     | 7q  | 150,268,796 | <i>KCNH2</i>         | Downstream              | QT interval [4]                 |
| rs1805123                                     | 7q  | 150,276,467 | <i>KCNH2</i>         | K897T                   | QT interval [1,2,4]             |
| rs3807375                                     | 7q  | 150,298,143 | <i>KCNH2</i>         | Intronic                | QT interval [1,2,4,12]          |
| rs2383207                                     | 9p  | 22,105,959  | <i>CDKN2A/CDKN2B</i> | Upstream                | MI, SCD [13,14]                 |
| rs2074238                                     | 11p | 2,441,379   | <i>KCNQ1</i>         | Intronic                | QT interval [4]                 |
| rs757092                                      | 11p | 2,455,754   | <i>KCNQ1</i>         | Intronic                | QT interval [1,15]              |
| rs12576239                                    | 11p | 2,458,895   | <i>KCNQ1</i>         | Intronic                | QT interval [4]                 |
| rs10798                                       | 11p | 2,826,741   | <i>KCNQ1</i>         | 3'UTR                   | QT interval [16]                |
| rs735951 ( $r^2 = 0.78$<br>with rs8049607)    | 16p | 11,601,037  | <i>LITAF</i>         | Upstream                | QT interval [1,4]               |
| rs37062                                       | 16q | 57,124,739  | <i>CNOT1</i>         | Intronic                | QT interval [4]                 |
| rs2074518                                     | 17q | 30,348,495  | <i>LIG3</i>          | Intronic                | QT interval [1,4]               |
| rs17779747                                    | 17q | 66,006,587  | <i>KCNJ2</i>         | Downstream              | QT interval [1,4]               |
| rs1805128                                     | 21q | 34,743,550  | <i>KCNE1</i>         | D85N                    | QT interval [1,2,4]             |
| rs727957                                      | 21q | 34,801,942  | <i>KCNE1</i>         | Intronic                | QT interval [1,15]              |

Chr = chromosome, MI = myocardial infarction, SCD = sudden cardiac death, SNP = single nucleotide polymorphism, UTR = untranslated region.

\*Unpublished PR-interval candidate SNPs studied in the Framingham Heart Study.

## References:

1. Pfeufer A, Sanna S, Arking DE, Müller M, Gateva V, et al. (2009) Common variants at ten loci modulate the QT interval duration in the QTSCD Study. *Nat Genet* 41: 407-414.
2. Marjamaa A, Newton-Cheh C, Porthan K, Reunanen A, Lahermo P, et al. (2009) Common candidate gene variants are associated with QT interval duration in the general population. *J Intern Med* 265: 448-458.
3. Marroni F, Pfeufer A, Aulchenko YS, Franklin CS, Isaacs A, et al. (2009) A genome-wide association scan of RR and QT interval duration in 3 European genetically isolated populations: the EUROSPAN project. *Circ Cardiovasc Genet* 2: 322-328.
4. Newton-Cheh C, Eijgelsheim M, Rice KM, de Bakker PI, Yin X, et al. (2009) Common variants at ten loci influence QT interval duration in the QTGEN Study. *Nat Genet* 41: 399-406.
5. Eijgelsheim M, Aarnoudse AL, Rivadeneira F, Kors JA, Witteman JC, et al. (2009) Identification of a common variant at the NOS1AP locus strongly associated to QT-interval duration. *Hum Mol Genet* 18: 347-357.
6. Holm H, Gudbjartsson DF, Arnar DO, Thorleifsson G, Thorgeirsson G, et al. (2010) Several common variants modulate heart rate, PR interval and QRS duration. *Nat Genet* 42: 117-122.
7. Aydin A, Bähring S, Dahm S, Guenther UP, Uhlmann R, et al. (2005) Single nucleotide polymorphism map of five long-QT genes. *J Mol Med* 83: 159-165.
8. Gouas L, Nicaud V, Chaouch S, Berthet M, Forhan A, et al. (2007) Confirmation of associations between ion channel gene SNPs and QTc interval duration in healthy subjects. *Eur J Hum Genet* 15: 974-979.
9. Smith JG, Magnani JW, Palmer C, Meng YA, Soliman EZ, et al. (2011) Genome-Wide Association Studies of the PR Interval in African Americans. *PLoS Genet* 7: e1001304.
10. Gudbjartsson DF, Arnar DO, Helgadóttir A, Gretarsdóttir S, Holm H, et al. (2007) Variants conferring risk of atrial fibrillation on chromosome 4q25. *Nature* 448: 353-357.
11. Sotoodehnia N, Siscovick DS, Vatta M, Psaty BM, Tracy RP, et al. (2006) Beta2-adrenergic receptor genetic variants and risk of sudden cardiac death. *Circulation* 113: 1842-1848.
12. Newton-Cheh C, Guo CY, Larson MG, Musone SL, Surti A, et al. (2007) Common genetic variation in KCNH2 is associated with QT interval duration: the Framingham Heart Study. *Circulation* 116: 1128-1136.
13. Helgadóttir A, Thorleifsson G, Manolescu A, Gretarsdóttir S, Blondal T, et al. (2007) A common variant on chromosome 9p21 affects the risk of myocardial infarction. *Science* 316: 1491-1493.
14. Newton-Cheh C, Cook NR, VanDenburgh M, Rimm EB, Ridker PM, et al. (2009) A common variant at 9p21 is associated with sudden and arrhythmic cardiac death. *Circulation* 120: 2062-2068.
15. Pfeufer A, Jalilzadeh S, Perz S, Mueller JC, Hinterseer M, et al. (2005) Common variants in myocardial ion channel genes modify the QT interval in the general population: results from the KORA study. *Circ Res* 96: 693-701.

16. Gouas L, Nicaud V, Berthet M, Forhan A, Tiret L, et al. (2005) Association of KCNQ1, KCNE1, KCNH2 and SCN5A polymorphisms with QTc interval length in a healthy population. *Eur J Hum Genet* 13: 1213-1222.
