# Supplementary material for: Common Genetic Variants Associated with Sudden Cardiac Death: The FinSCDgen Study
Source: PubMed Central journal article supplement (PMC3402479; doi:10.1371/journal.pone.0041675), 2012-07-23
Supplement: pone.0041675.s006.pdf [file pone.0041675.s006.pdf]

**Table S5. SNP genotyping results in the different study samples.**

| SNP        | Coded allele | FINRISK and Health 2000 combined |                       |           | FINRISK |                       |           | Health 2000 |                      |           | HSDS |             |           | TASTY |             |           |
|------------|--------------|----------------------------------|-----------------------|-----------|---------|-----------------------|-----------|-------------|----------------------|-----------|------|-------------|-----------|-------|-------------|-----------|
|            |              | AF                               | HWE P-value           | Call rate | AF      | HWE P-value           | Call rate | AF          | HWE P-value          | Call rate | AF   | HWE P-value | Call rate | AF    | HWE P-value | Call rate |
| rs846111   | C            | 0.26                             | 0.58                  | 1.00      | 0.26    | 0.66                  | 1.00      | 0.25        | 0.73                 | 1.00      | 0.25 | 0.44        | 1.00      | 0.27  | 0.08        | 1.00      |
| rs2880058  | G            | 0.36                             | 0.98                  | 1.00      | 0.36    | 0.81                  | 1.00      | 0.35        | 0.60                 | 0.99      | 0.34 | 0.74        | 1.00      | 0.34  | 0.12        | 1.00      |
| rs12036340 | G            | 0.25                             | 0.19                  | 0.98      | 0.25    | 0.24                  | 0.98      | 0.24        | 0.52                 | 0.99      | 0.24 | 0.58        | 1.00      | 0.25  | 0.21        | 1.00      |
| rs12143842 | T            | 0.25                             | 0.60                  | 1.00      | 0.25    | 0.42                  | 1.00      | 0.24        | 0.69                 | 1.00      | 0.24 | 0.52        | 1.00      | 0.25  | 0.16        | 0.99      |
| rs10919071 | G            | 0.11                             | 0.36                  | 0.99      | 0.10    | 0.43                  | 0.99      | 0.11        | 0.64                 | 0.99      | 0.11 | 0.74        | 1.00      | 0.12  | 0.28        | 0.99      |
| rs1805126  | G            | 0.44                             | 0.17                  | 1.00      | 0.44    | 0.12                  | 1.00      | 0.43        | 0.95                 | 0.99      | 0.39 | 0.57        | 1.00      | 0.42  | 0.08        | 1.00      |
| rs12053903 | C            | 0.41                             | 0.18                  | 0.99      | 0.41    | 0.38                  | 1.00      | 0.41        | 0.23                 | 0.99      | 0.37 | 0.40        | 1.00      | 0.38  | 0.22        | 1.00      |
| rs41312391 | T            | 0.20                             | 0.02                  | 0.98      | 0.20    | 0.003                 | 0.99      | 0.20        | 0.68                 | 0.97      | 0.18 | 0.19        | 1.00      | 0.19  | 0.93        | 1.00      |
| rs3922844  | T            | 0.26                             | 0.82                  | 1.00      | 0.26    | 0.54                  | 1.00      | 0.26        | 0.52                 | 1.00      | 0.24 | 0.84        | 0.95      | 0.27  | 0.12        | 0.94      |
| rs6599219  | G            | 0.37                             | 0.60                  | 1.00      | 0.37    | 0.74                  | 1.00      | 0.36        | 0.64                 | 0.99      | 0.37 | 0.12        | 1.00      | 0.35  | 0.06        | 1.00      |
| rs7372712  | T            | 0.16                             | 0.15                  | 1.00      | 0.16    | 0.11                  | 1.00      | 0.16        | 0.94                 | 1.00      | 0.14 | 0.30        | 1.00      | 0.19  | 0.55        | 1.00      |
| rs2200733  | T            | 0.16                             | 0.02                  | 0.96      | 0.16    | 0.04                  | 0.96      | 0.16        | 0.28                 | 0.98      | 0.17 | 0.99        | 0.99      | 0.13  | 0.88        | 0.98      |
| rs10033464 | T            | 0.17                             | 0.92                  | 0.92      | 0.17    | 0.75                  | 0.91      | 0.16        | 0.68                 | 0.96      | 0.16 | 0.48        | 0.97      | 0.15  | 0.96        | 0.86      |
| rs1042714  | G            | 0.38                             | 0.30                  | 1.00      | 0.38    | 0.03                  | 1.00      | 0.38        | 0.07                 | 0.99      | 0.35 | 0.69        | 1.00      | 0.36  | 0.90        | 1.00      |
| rs12210810 | C            | 0.03                             | 0.10                  | 1.00      | 0.03    | 0.30                  | 1.00      | 0.03        | 0.13                 | 1.00      | 0.03 | 0.66        | 1.00      | 0.03  | 0.61        | 1.00      |
| rs11756440 | A            | 0.46                             | $1.0 \times 10^{-12}$ | 0.97      | 0.46    | $6.6 \times 10^{-10}$ | 0.97      | 0.47        | $4.0 \times 10^{-4}$ | 0.99      | 0.48 | 0.22        | 1.00      | 0.47  | 0.19        | 1.00      |
| rs4725982  | T            | 0.29                             | 0.80                  | 1.00      | 0.29    | 0.64                  | 1.00      | 0.28        | 0.71                 | 1.00      | 0.29 | 0.93        | 1.00      | 0.29  | 0.19        | 1.00      |
| rs1805123  | G            | 0.17                             | 0.87                  | 0.99      | 0.16    | 0.37                  | 0.99      | 0.18        | 0.08                 | 0.96      | NA   | NA          | NA        | NA    | NA          | NA        |
| rs3807375  | T            | 0.44                             | 0.23                  | 1.00      | 0.45    | 0.12                  | 1.00      | 0.43        | 0.67                 | 1.00      | 0.47 | 0.46        | 1.00      | 0.43  | 0.34        | 0.99      |
| rs2383207  | G            | 0.43                             | 0.72                  | 0.99      | 0.43    | 0.91                  | 0.99      | 0.43        | 0.35                 | 0.99      | 0.45 | 0.06        | 0.99      | 0.43  | 0.23        | 1.00      |
| rs2074238  | T            | 0.09                             | 0.01                  | 1.00      | 0.09    | 0.05                  | 1.00      | 0.09        | 0.12                 | 1.00      | 0.10 | 0.62        | 1.00      | 0.07  | 0.38        | 1.00      |

|            |   |      |       |      |      |      |      |      |      |      |      |      |      |      |      |      |
|------------|---|------|-------|------|------|------|------|------|------|------|------|------|------|------|------|------|
| rs757092   | G | 0.36 | 0.59  | 0.99 | 0.36 | 0.56 | 1.00 | 0.36 | 0.95 | 0.98 | 0.38 | 0.59 | 0.97 | 0.32 | 0.83 | 0.89 |
| rs12576239 | T | 0.16 | 0.80  | 1.00 | 0.16 | 0.44 | 1.00 | 0.16 | 0.38 | 1.00 | 0.16 | 0.95 | 1.00 | 0.17 | 0.94 | 1.00 |
| rs10798    | G | 0.36 | 0.67  | 1.00 | 0.36 | 0.49 | 1.00 | 0.37 | 0.73 | 0.99 | 0.36 | 0.86 | 1.00 | 0.35 | 0.21 | 1.00 |
| rs735951   | A | 0.42 | 0.37  | 1.00 | 0.42 | 0.83 | 1.00 | 0.42 | 0.15 | 0.99 | 0.45 | 0.27 | 1.00 | 0.42 | 1.00 | 0.99 |
| rs37062    | G | 0.27 | 0.006 | 1.00 | 0.27 | 0.03 | 1.00 | 0.26 | 0.09 | 1.00 | 0.25 | 0.54 | 1.00 | 0.24 | 0.35 | 1.00 |
| rs2074518  | C | 0.45 | 0.04  | 0.51 | 0.45 | 0.04 | 0.60 | 0.45 | 0.69 | 0.24 | NA   | NA   | NA   | NA   | NA   | NA   |
| rs17779747 | T | 0.25 | 0.82  | 1.00 | 0.25 | 0.72 | 1.00 | 0.25 | 0.87 | 1.00 | 0.24 | 0.38 | 1.00 | 0.30 | 0.24 | 1.00 |
| rs1805128  | T | 0.02 | 0.62  | 1.00 | 0.02 | 0.81 | 1.00 | 0.01 | 0.08 | 1.00 | 0.02 | 0.79 | 1.00 | 0.01 | 0.86 | 1.00 |
| rs727957   | T | 0.17 | 0.30  | 1.00 | 0.17 | 0.34 | 1.00 | 0.17 | 0.67 | 1.00 | 0.18 | 0.32 | 1.00 | 0.18 | 0.87 | 1.00 |

Coded alleles refer to the allele coded 0,1,2 with reference to the positive strand of the reference sequence of the human genome—NCBI build 36.1. AF = coded allele frequency, HSDS = The Helsinki Sudden Death Study, HWE = Hardy-Weinberg equilibrium, NA = no genotype information available, SNP = single nucleotide polymorphism, TASTY = The Tampere Autopsy Study.
