# Supplementary material for: Common Genetic Variants Associated with Sudden Cardiac Death: The FinSCDgen Study
Source: PubMed Central journal article supplement (PMC3402479; doi:10.1371/journal.pone.0041675), 2012-07-23
Supplement: pone.0041675.s008.pdf [file pone.0041675.s008.pdf]

**Table S7. Meta-analysis of all-cause and cardiac mortality.**

| SNP                        | Population cohorts, HR (95% CI)* |                  |                  |                  | Autopsy studies, OR (95% CI)† |                  | Fixed-effects meta-analysis |                  |                      |
|----------------------------|----------------------------------|------------------|------------------|------------------|-------------------------------|------------------|-----------------------------|------------------|----------------------|
|                            | FINRISK 1992                     | FINRISK 1997     | FINRISK 2002     | Health 2000      | HSDS                          | TASTY            | I <sup>2</sup>              | RR (95% CI)      | P-value              |
| <b>All-cause mortality</b> |                                  |                  |                  |                  |                               |                  |                             |                  |                      |
| rs41312391                 | 1.02 (0.88-1.19)                 | 1.02 (0.89-1.18) | 1.05 (0.84-1.32) | 0.91 (0.75-1.10) | NA                            | NA               | 0.00                        | 1.00 (0.92-1.09) | 0.96                 |
| rs2200733                  | 1.00 (0.84-1.19)                 | 0.98 (0.85-1.14) | 1.08 (0.85-1.37) | 1.17 (0.97-1.42) | NA                            | NA               | 0.00                        | 1.04 (0.95-1.14) | 0.40                 |
| <b>Cardiac mortality</b>   |                                  |                  |                  |                  |                               |                  |                             |                  |                      |
| rs41312391                 | 1.13 (0.88-1.46)                 | 1.17 (0.93-1.47) | 1.00 (0.66-1.53) | 0.90 (0.65-1.26) | 1.21 (0.79-1.84)              | 1.13 (0.77-1.65) | 0.00                        | 1.10 (0.97-1.25) | 0.14                 |
| rs2200733                  | 1.12 (0.82-1.53)                 | 1.13 (0.88-1.45) | 1.20 (0.77-1.87) | 1.73 (1.28-2.34) | 1.15 (0.73-1.81)              | 1.58 (1.02-2.45) | 0.24                        | 1.28 (1.12-1.47) | 3.8x10 <sup>-4</sup> |

CI = confidence interval, HR = hazard ratio (in Cox regression), HSDS = The Helsinki Sudden Death Study, I<sup>2</sup> = measure of heterogeneity between studies, OR = odds ratio (in logistic regression), RR = relative risk, SNP = single nucleotide polymorphism, TASTY = The Tampere Autopsy Study.

\*Age was used as the time scale and sex and geographic region were adjusted for.

†Age at death and sex were adjusted for.
