# Supplementary material for: Common Genetic Variants Associated with Sudden Cardiac Death: The FinSCDgen Study
Source: PubMed Central journal article supplement (PMC3402479; doi:10.1371/journal.pone.0041675), 2012-07-23
Supplement: pone.0041675.s010.pdf [file pone.0041675.s010.pdf]

**Table S9. SCD meta-analysis results for all studied SNPs.**

| SNP        | Model | Population cohorts, HR (95% CI) |                  |                  |                  | Autopsy studies, OR (95% CI) |                  | Fixed-effects meta-analysis |                  |         |
|------------|-------|---------------------------------|------------------|------------------|------------------|------------------------------|------------------|-----------------------------|------------------|---------|
|            |       | FINRISK 1992                    | FINRISK 1997     | FINRISK 2002     | Health 2000      | HSDS                         | TASTY            | I <sup>2</sup>              | RR (95% CI)      | P-value |
| rs846111   | 1     | 0.93 (0.70-1.24)                | 1.05 (0.82-1.33) | 1.14 (0.79-1.64) | 1.29 (0.97-1.73) | 0.88 (0.58-1.32)             | 1.04 (0.73-1.47) | 0.00                        | 1.06 (0.93-1.20) | 0.39    |
| rs846111   | 2     | 0.96 (0.72-1.28)                | 1.06 (0.82-1.38) | 1.25 (0.86-1.81) | 1.37 (1.02-1.83) | NA                           | NA               | 0.11                        | 1.13 (0.98-1.31) | 0.10    |
| rs846111   | 3     | NA                              | 1.11 (0.85-1.43) | 1.26 (0.87-1.83) | 1.42 (1.06-1.91) | NA                           | NA               | 0.00                        | 1.24 (1.05-1.48) | 0.01    |
| rs846111   | 4     | 0.95 (0.71-1.27)                | 1.04 (0.80-1.35) | 1.28 (0.88-1.85) | 1.39 (1.04-1.86) | NA                           | NA               | 0.27                        | 1.13 (0.98-1.31) | 0.10    |
| rs2880058  | 1     | 0.99 (0.77-1.28)                | 1.02 (0.82-1.28) | 1.19 (0.85-1.65) | 1.08 (0.83-1.42) | 0.93 (0.65-1.32)             | 1.16 (0.82-1.66) | 0.00                        | 1.05 (0.94-1.18) | 0.41    |
| rs2880058  | 2     | 0.93 (0.72-1.21)                | 0.92 (0.72-1.17) | 1.20 (0.86-1.68) | 1.04 (0.78-1.37) | NA                           | NA               | 0.00                        | 0.99 (0.87-1.14) | 0.93    |
| rs2880058  | 3     | NA                              | 0.90 (0.71-1.15) | 1.19 (0.85-1.66) | 1.03 (0.78-1.37) | NA                           | NA               | 0.00                        | 1.01 (0.86-1.18) | 0.96    |
| rs2880058  | 4     | 0.93 (0.72-1.20)                | 0.93 (0.73-1.19) | 1.24 (0.88-1.73) | 1.01 (0.76-1.33) | NA                           | NA               | 0.00                        | 0.99 (0.87-1.14) | 0.91    |
| rs12036340 | 1     | 0.95 (0.71-1.28)                | 1.02 (0.80-1.31) | 1.36 (0.95-1.95) | 1.29 (0.96-1.74) | 0.92 (0.62-1.36)             | 1.20 (0.81-1.75) | 0.00                        | 1.10 (0.97-1.25) | 0.15    |
| rs12036340 | 2     | 0.88 (0.66-1.19)                | 0.87 (0.67-1.15) | 1.37 (0.97-1.95) | 1.24 (0.92-1.67) | NA                           | NA               | 0.54*                       | 1.06 (0.85-1.32) | 0.63    |
| rs12036340 | 3     | NA                              | 0.86 (0.66-1.12) | 1.35 (0.95-1.92) | 1.23 (0.91-1.66) | NA                           | NA               | 0.60*                       | 1.11 (0.84-1.46) | 0.48    |
| rs12036340 | 4     | 0.87 (0.65-1.18)                | 0.88 (0.67-1.15) | 1.40 (0.98-1.99) | 1.16 (0.86-1.56) | NA                           | NA               | 0.49                        | 1.02 (0.88-1.19) | 0.77    |
| rs12143842 | 1     | 0.88 (0.65-1.18)                | 1.06 (0.83-1.36) | 1.26 (0.88-1.81) | 1.26 (0.95-1.68) | 0.91 (0.61-1.34)             | 1.19 (0.81-1.74) | 0.00                        | 1.08 (0.95-1.23) | 0.25    |
| rs12143842 | 2     | 0.81 (0.60-1.09)                | 0.91 (0.69-1.19) | 1.27 (0.89-1.81) | 1.21 (0.91-1.62) | NA                           | NA               | 0.49                        | 1.01 (0.87-1.18) | 0.87    |
| rs12143842 | 3     | NA                              | 0.89 (0.68-1.16) | 1.25 (0.87-1.78) | 1.20 (0.90-1.61) | NA                           | NA               | 0.37                        | 1.07 (0.90-1.27) | 0.44    |
| rs12143842 | 4     | 0.80 (0.59-1.08)                | 0.91 (0.69-1.19) | 1.30 (0.91-1.85) | 1.12 (0.84-1.50) | NA                           | NA               | 0.43                        | 0.99 (0.85-1.15) | 0.90    |
| rs10919071 | 1     | 0.94 (0.62-1.43)                | 0.88 (0.62-1.27) | 1.48 (0.91-2.39) | 1.12 (0.74-1.70) | 0.91 (0.51-1.57)             | 0.80 (0.47-1.30) | 0.00                        | 1.00 (0.83-1.19) | 0.96    |
| rs10919071 | 2     | 0.98 (0.65-1.49)                | 0.82 (0.56-1.22) | 1.43 (0.88-2.34) | 1.11 (0.72-1.69) | NA                           | NA               | 0.05                        | 1.03 (0.83-1.28) | 0.77    |
| rs10919071 | 3     | NA                              | 0.79 (0.53-1.17) | 1.45 (0.89-2.36) | 1.09 (0.71-1.66) | NA                           | NA               | 0.45                        | 1.03 (0.80-1.32) | 0.81    |
| rs10919071 | 4     | 1.01 (0.67-1.54)                | 0.78 (0.52-1.15) | 1.47 (0.90-2.40) | 1.12 (0.74-1.71) | NA                           | NA               | 0.29                        | 1.03 (0.83-1.28) | 0.77    |
| rs1805126  | 1     | 1.22 (0.95-1.57)                | 1.07 (0.87-1.33) | 1.51 (1.08-2.11) | 0.99 (0.76-1.30) | 1.10 (0.78-1.55)             | 1.16 (0.82-1.64) | 0.00                        | 1.14 (1.02-1.28) | 0.02    |
| rs1805126  | 2     | 1.26 (0.98-1.61)                | 1.00 (0.79-1.25) | 1.50 (1.07-2.09) | 0.99 (0.75-1.31) | NA                           | NA               | 0.45                        | 1.14 (1.00-1.30) | 0.06    |
| rs1805126  | 3     | NA                              | 0.96 (0.76-1.21) | 1.51 (1.08-2.11) | 1.02 (0.77-1.35) | NA                           | NA               | 0.61*                       | 1.12 (0.86-1.44) | 0.40    |
| rs1805126  | 4     | 1.27 (0.99-1.63)                | 0.97 (0.77-1.23) | 1.56 (1.12-2.17) | 1.03 (0.78-1.37) | NA                           | NA               | 0.54*                       | 1.17 (0.96-1.42) | 0.13    |
| rs12053903 | 1     | 1.28 (1.00-1.64)                | 1.04 (0.84-1.29) | 1.38 (1.00-1.92) | 0.98 (0.75-1.29) | 1.12 (0.80-1.59)             | 1.06 (0.74-1.50) | 0.00                        | 1.12 (1.00-1.26) | 0.045   |
| rs12053903 | 2     | 1.32 (1.03-1.68)                | 1.04 (0.82-1.31) | 1.37 (0.98-1.89) | 0.98 (0.74-1.30) | NA                           | NA               | 0.28                        | 1.15 (1.01-1.31) | 0.041   |
| rs12053903 | 3     | NA                              | 0.99 (0.78-1.26) | 1.37 (0.99-1.90) | 1.01 (0.76-1.34) | NA                           | NA               | 0.27                        | 1.08 (0.92-1.26) | 0.37    |
| rs12053903 | 4     | 1.32 (1.03-1.69)                | 1.03 (0.81-1.30) | 1.42 (1.03-1.97) | 1.03 (0.77-1.37) | NA                           | NA               | 0.29                        | 1.17 (1.02-1.34) | 0.02    |

|            |   |                  |                  |                  |                  |                  |                  |       |                  |                      |
|------------|---|------------------|------------------|------------------|------------------|------------------|------------------|-------|------------------|----------------------|
| rs41312391 | 1 | 1.43 (1.09-1.87) | 1.32 (1.04-1.68) | 1.41 (0.97-2.04) | 1.05 (0.76-1.46) | 1.20 (0.78-1.83) | 1.09 (0.72-1.62) | 0.00  | 1.27 (1.11-1.45) | 3.4x10 <sup>-4</sup> |
| rs41312391 | 2 | 1.53 (1.16-2.01) | 1.33 (1.03-1.73) | 1.44 (0.99-2.08) | 1.07 (0.76-1.50) | NA               | NA               | 0.00  | 1.35 (1.16-1.57) | 1.2x10 <sup>-4</sup> |
| rs41312391 | 3 | NA               | 1.24 (0.95-1.61) | 1.44 (0.99-2.09) | 1.10 (0.79-1.55) | NA               | NA               | 0.00  | 1.24 (1.04-1.49) | 0.02                 |
| rs41312391 | 4 | 1.55 (1.18-2.05) | 1.28 (0.98-1.66) | 1.47 (1.02-2.14) | 1.16 (0.82-1.64) | NA               | NA               | 0.00  | 1.36 (1.17-1.58) | 6.8x10 <sup>-5</sup> |
| rs3922844  | 1 | 0.90 (0.68-1.20) | 1.24 (0.98-1.56) | 1.04 (0.71-1.52) | 1.29 (0.96-1.73) | 0.88 (0.58-1.33) | 0.96 (0.67-1.38) | 0.10  | 1.08 (0.95-1.23) | 0.22                 |
| rs3922844  | 2 | 0.90 (0.67-1.22) | 1.16 (0.90-1.48) | 1.08 (0.74-1.58) | 1.24 (0.92-1.68) | NA               | NA               | 0.00  | 1.10 (0.95-1.27) | 0.22                 |
| rs3922844  | 3 | NA               | 1.16 (0.91-1.49) | 1.09 (0.75-1.60) | 1.25 (0.92-1.70) | NA               | NA               | 0.00  | 1.18 (0.99-1.40) | 0.07                 |
| rs3922844  | 4 | 0.90 (0.67-1.21) | 1.12 (0.87-1.44) | 1.09 (0.74-1.59) | 1.20 (0.88-1.63) | NA               | NA               | 0.00  | 1.07 (0.92-1.24) | 0.37                 |
| rs6599219  | 1 | 0.91 (0.70-1.17) | 1.01 (0.81-1.27) | 1.09 (0.78-1.53) | 0.80 (0.60-1.06) | 1.01 (0.72-1.43) | 1.05 (0.76-1.45) | 0.00  | 0.97 (0.86-1.08) | 0.54                 |
| rs6599219  | 2 | 0.97 (0.75-1.25) | 1.06 (0.84-1.35) | 1.04 (0.74-1.45) | 0.79 (0.59-1.06) | NA               | NA               | 0.00  | 0.97 (0.84-1.11) | 0.62                 |
| rs6599219  | 3 | NA               | 1.06 (0.83-1.35) | 1.06 (0.75-1.48) | 0.79 (0.59-1.05) | NA               | NA               | 0.28  | 0.96 (0.82-1.13) | 0.66                 |
| rs6599219  | 4 | 0.98 (0.76-1.26) | 1.08 (0.85-1.38) | 1.06 (0.75-1.49) | 0.81 (0.61-1.09) | NA               | NA               | 0.00  | 0.98 (0.86-1.13) | 0.79                 |
| rs7372712  | 1 | 0.90 (0.63-1.27) | 0.88 (0.65-1.20) | 1.25 (0.83-1.89) | 1.16 (0.83-1.62) | 0.84 (0.50-1.41) | 1.14 (0.76-1.69) | 0.00  | 1.01 (0.87-1.18) | 0.86                 |
| rs7372712  | 2 | 0.97 (0.67-1.40) | 0.84 (0.61-1.18) | 1.20 (0.79-1.84) | 1.12 (0.80-1.58) | NA               | NA               | 0.00  | 1.01 (0.84-1.21) | 0.91                 |
| rs7372712  | 3 | NA               | 0.90 (0.64-1.25) | 1.23 (0.81-1.88) | 1.10 (0.78-1.54) | NA               | NA               | 0.00  | 1.04 (0.85-1.28) | 0.69                 |
| rs7372712  | 4 | 0.97 (0.67-1.40) | 0.88 (0.63-1.23) | 1.23 (0.80-1.87) | 1.12 (0.79-1.58) | NA               | NA               | 0.00  | 1.02 (0.85-1.23) | 0.81                 |
| rs2200733  | 1 | 1.15 (0.83-1.59) | 1.15 (0.88-1.49) | 1.55 (1.04-2.32) | 1.42 (1.02-1.98) | 1.12 (0.71-1.78) | 1.58 (1.00-2.50) | 0.00  | 1.28 (1.11-1.48) | 7.9x10 <sup>-4</sup> |
| rs2200733  | 2 | 1.06 (0.77-1.47) | 1.23 (0.93-1.63) | 1.67 (1.11-2.50) | 1.30 (0.92-1.82) | NA               | NA               | 0.00  | 1.26 (1.07-1.49) | 0.006                |
| rs2200733  | 3 | NA               | 1.20 (0.90-1.60) | 1.60 (1.06-2.40) | 1.28 (0.91-1.81) | NA               | NA               | 0.00  | 1.31 (1.08-1.59) | 0.006                |
| rs2200733  | 4 | 1.03 (0.75-1.43) | 1.18 (0.88-1.57) | 1.53 (1.02-2.31) | 1.19 (0.84-1.69) | NA               | NA               | 0.00  | 1.19 (1.01-1.41) | 0.040                |
| rs2200733  | 5 | NA               | NA               | NA               | 1.22 (0.85-1.74) | NA               | NA               | NA    | NA               | NA                   |
| rs10033464 | 1 | 1.28 (0.92-1.77) | 0.92 (0.68-1.25) | 1.19 (0.78-1.82) | 0.94 (0.64-1.36) | 1.32 (0.82-2.13) | 1.20 (0.73-1.93) | 0.00  | 1.10 (0.94-1.28) | 0.23                 |
| rs10033464 | 2 | 1.36 (0.98-1.90) | 0.91 (0.65-1.26) | 1.23 (0.80-1.90) | 1.03 (0.70-1.50) | NA               | NA               | 0.09  | 1.11 (0.93-1.33) | 0.27                 |
| rs10033464 | 3 | NA               | 0.91 (0.66-1.27) | 1.26 (0.82-1.95) | 1.04 (0.71-1.51) | NA               | NA               | 0.00  | 1.03 (0.83-1.28) | 0.77                 |
| rs10033464 | 4 | 1.36 (0.97-1.90) | 0.95 (0.68-1.32) | 1.27 (0.82-1.97) | 0.96 (0.65-1.41) | NA               | NA               | 0.07  | 1.12 (0.93-1.34) | 0.24                 |
| rs1042714  | 1 | 0.78 (0.60-1.01) | 1.22 (0.99-1.51) | 0.81 (0.58-1.14) | 0.96 (0.73-1.27) | 1.07 (0.75-1.54) | 1.12 (0.80-1.57) | 0.44  | 1.00 (0.89-1.12) | 0.99                 |
| rs1042714  | 2 | 0.83 (0.64-1.07) | 1.28 (1.01-1.61) | 0.89 (0.63-1.25) | 0.96 (0.73-1.28) | NA               | NA               | 0.57* | 0.99 (0.80-1.22) | 0.90                 |
| rs1042714  | 3 | NA               | 1.27 (1.01-1.60) | 0.90 (0.64-1.26) | 0.96 (0.72-1.27) | NA               | NA               | 0.45  | 1.08 (0.92-1.26) | 0.36                 |
| rs1042714  | 4 | 0.83 (0.64-1.08) | 1.29 (1.03-1.63) | 0.90 (0.64-1.26) | 1.00 (0.76-1.33) | NA               | NA               | 0.57* | 1.01 (0.82-1.24) | 0.96                 |
| rs12210810 | 1 | 0.79 (0.37-1.67) | 0.77 (0.40-1.49) | 1.77 (0.86-3.61) | 1.04 (0.51-2.10) | 0.52 (0.14-1.63) | 0.68 (0.19-1.95) | 0.00  | 0.94 (0.68-1.30) | 0.71                 |
| rs12210810 | 2 | 0.89 (0.42-1.91) | 0.77 (0.38-1.56) | 1.60 (0.77-3.36) | 0.89 (0.45-1.78) | NA               | NA               | 0.00  | 0.99 (0.69-1.42) | 0.94                 |
| rs12210810 | 3 | NA               | 0.69 (0.34-1.42) | 1.55 (0.73-3.27) | 0.94 (0.47-1.87) | NA               | NA               | 0.14  | 0.99 (0.65-1.50) | 0.96                 |

|            |   |                  |                  |                  |                  |                  |                  |       |                  |      |
|------------|---|------------------|------------------|------------------|------------------|------------------|------------------|-------|------------------|------|
| rs12210810 | 4 | 0.91 (0.43-1.94) | 0.73 (0.36-1.49) | 1.59 (0.76-3.34) | 0.88 (0.44-1.78) | NA               | NA               | 0.00  | 0.98 (0.68-1.40) | 0.89 |
| rs4725982  | 1 | 0.73 (0.54-0.97) | 1.08 (0.86-1.36) | 1.00 (0.69-1.43) | 1.23 (0.92-1.65) | 1.11 (0.76-1.62) | 1.66 (1.15-2.39) | 0.62* | 1.09 (0.89-1.34) | 0.42 |
| rs4725982  | 2 | 0.62 (0.46-0.84) | 1.08 (0.85-1.38) | 0.98 (0.68-1.41) | 1.24 (0.93-1.66) | NA               | NA               | 0.75* | 0.95 (0.71-1.28) | 0.75 |
| rs4725982  | 3 | NA               | 1.05 (0.82-1.35) | 0.97 (0.67-1.40) | 1.23 (0.91-1.64) | NA               | NA               | 0.00  | 1.09 (0.92-1.29) | 0.32 |
| rs4725982  | 4 | 0.60 (0.45-0.82) | 1.11 (0.87-1.42) | 0.97 (0.67-1.40) | 1.19 (0.88-1.59) | NA               | NA               | 0.76* | 0.94 (0.69-1.28) | 0.70 |
| rs1805123  | 1 | 1.39 (1.04-1.88) | 1.06 (0.80-1.40) | 0.55 (0.31-0.95) | 0.89 (0.62-1.26) | NA               | NA               | 0.69* | 0.97 (0.71-1.34) | 0.87 |
| rs1805123  | 2 | 1.42 (1.05-1.91) | 1.03 (0.76-1.40) | 0.58 (0.33-1.02) | 0.83 (0.58-1.20) | NA               | NA               | 0.69* | 0.97 (0.70-1.34) | 0.84 |
| rs1805123  | 3 | NA               | 1.08 (0.79-1.47) | 0.58 (0.33-1.01) | 0.83 (0.58-1.20) | NA               | NA               | 0.49  | 0.90 (0.72-1.11) | 0.32 |
| rs1805123  | 4 | 1.48 (1.10-1.99) | 1.03 (0.76-1.39) | 0.59 (0.34-1.03) | 0.82 (0.57-1.19) | NA               | NA               | 0.72* | 0.97 (0.69-1.37) | 0.86 |
| rs3807375  | 1 | 0.86 (0.67-1.11) | 1.05 (0.85-1.29) | 1.09 (0.79-1.52) | 1.52 (1.15-2.00) | 1.29 (0.92-1.82) | 1.49 (1.07-2.11) | 0.61* | 1.18 (0.98-1.41) | 0.08 |
| rs3807375  | 2 | 0.77 (0.60-0.99) | 1.01 (0.81-1.26) | 1.07 (0.77-1.49) | 1.52 (1.16-2.01) | NA               | NA               | 0.77* | 1.06 (0.80-1.39) | 0.69 |
| rs3807375  | 3 | NA               | 1.02 (0.82-1.28) | 1.07 (0.77-1.50) | 1.50 (1.14-1.98) | NA               | NA               | 0.59* | 1.18 (0.92-1.51) | 0.20 |
| rs3807375  | 4 | 0.75 (0.58-0.97) | 1.06 (0.85-1.32) | 1.04 (0.74-1.45) | 1.47 (1.11-1.93) | NA               | NA               | 0.76* | 1.05 (0.80-1.37) | 0.75 |
| rs2383207  | 1 | 1.04 (0.81-1.32) | 1.00 (0.81-1.24) | 1.15 (0.83-1.60) | 1.06 (0.82-1.38) | 1.31 (0.91-1.90) | 1.61 (1.17-2.23) | 0.31  | 1.13 (1.01-1.26) | 0.04 |
| rs2383207  | 2 | 0.98 (0.77-1.25) | 0.89 (0.71-1.12) | 1.08 (0.77-1.51) | 1.02 (0.78-1.32) | NA               | NA               | 0.00  | 0.98 (0.86-1.11) | 0.71 |
| rs2383207  | 3 | NA               | 0.93 (0.74-1.18) | 1.07 (0.77-1.50) | 1.05 (0.80-1.36) | NA               | NA               | 0.00  | 1.00 (0.86-1.17) | 1.00 |
| rs2383207  | 4 | 0.98 (0.77-1.25) | 0.90 (0.71-1.14) | 1.05 (0.75-1.48) | 1.08 (0.83-1.41) | NA               | NA               | 0.00  | 0.99 (0.87-1.13) | 0.85 |
| rs2074238  | 1 | 0.98 (0.65-1.47) | 0.77 (0.52-1.15) | 1.22 (0.72-2.07) | 1.15 (0.76-1.74) | 1.03 (0.57-1.84) | 1.03 (0.55-1.89) | 0.00  | 1.00 (0.82-1.21) | 0.98 |
| rs2074238  | 2 | 0.97 (0.64-1.48) | 0.77 (0.50-1.18) | 1.16 (0.68-1.96) | 1.10 (0.73-1.65) | NA               | NA               | 0.00  | 0.98 (0.78-1.22) | 0.82 |
| rs2074238  | 3 | NA               | 0.82 (0.53-1.25) | 1.17 (0.69-2.00) | 1.13 (0.75-1.70) | NA               | NA               | 0.00  | 1.01 (0.78-1.31) | 0.92 |
| rs2074238  | 4 | 0.97 (0.64-1.48) | 0.84 (0.55-1.29) | 1.22 (0.72-2.07) | 1.13 (0.76-1.70) | NA               | NA               | 0.00  | 1.02 (0.82-1.27) | 0.89 |
| rs757092   | 1 | 0.89 (0.69-1.15) | 0.91 (0.72-1.14) | 0.82 (0.58-1.17) | 1.25 (0.96-1.64) | 0.94 (0.65-1.36) | 0.90 (0.62-1.30) | 0.03  | 0.95 (0.85-1.07) | 0.43 |
| rs757092   | 2 | 0.79 (0.60-1.04) | 0.87 (0.68-1.11) | 0.81 (0.56-1.15) | 1.17 (0.89-1.55) | NA               | NA               | 0.37  | 0.90 (0.79-1.04) | 0.15 |
| rs757092   | 3 | NA               | 0.88 (0.69-1.12) | 0.80 (0.56-1.15) | 1.17 (0.88-1.55) | NA               | NA               | 0.41  | 0.95 (0.81-1.12) | 0.52 |
| rs757092   | 4 | 0.80 (0.61-1.05) | 0.88 (0.70-1.13) | 0.82 (0.58-1.18) | 1.17 (0.88-1.55) | NA               | NA               | 0.28  | 0.91 (0.79-1.05) | 0.19 |
| rs12576239 | 1 | 1.05 (0.75-1.47) | 0.73 (0.53-1.01) | 0.87 (0.55-1.37) | 0.98 (0.67-1.42) | 1.17 (0.73-1.87) | 0.91 (0.57-1.41) | 0.00  | 0.92 (0.79-1.08) | 0.32 |
| rs12576239 | 2 | 0.99 (0.71-1.39) | 0.72 (0.51-1.01) | 0.83 (0.52-1.32) | 0.96 (0.66-1.40) | NA               | NA               | 0.00  | 0.87 (0.72-1.05) | 0.14 |
| rs12576239 | 3 | NA               | 0.77 (0.54-1.08) | 0.83 (0.52-1.32) | 0.94 (0.64-1.37) | NA               | NA               | 0.00  | 0.84 (0.67-1.05) | 0.12 |
| rs12576239 | 4 | 0.98 (0.70-1.38) | 0.74 (0.53-1.04) | 0.86 (0.53-1.37) | 0.90 (0.61-1.33) | NA               | NA               | 0.00  | 0.87 (0.72-1.04) | 0.13 |
| rs10798    | 1 | 0.89 (0.69-1.16) | 1.08 (0.86-1.35) | 1.06 (0.76-1.49) | 1.15 (0.88-1.52) | 1.20 (0.85-1.72) | 0.91 (0.64-1.29) | 0.00  | 1.04 (0.93-1.17) | 0.49 |
| rs10798    | 2 | 0.89 (0.68-1.16) | 1.08 (0.85-1.37) | 1.05 (0.75-1.47) | 1.13 (0.86-1.50) | NA               | NA               | 0.00  | 1.03 (0.90-1.18) | 0.67 |
| rs10798    | 3 | NA               | 1.07 (0.84-1.36) | 1.05 (0.75-1.48) | 1.12 (0.85-1.48) | NA               | NA               | 0.00  | 1.08 (0.92-1.27) | 0.33 |

|            |   |                  |                  |                  |                  |                  |                  |      |                  |      |
|------------|---|------------------|------------------|------------------|------------------|------------------|------------------|------|------------------|------|
| rs10798    | 4 | 0.86 (0.66-1.12) | 1.09 (0.86-1.39) | 1.04 (0.74-1.45) | 1.11 (0.83-1.47) | NA               | NA               | 0.00 | 1.02 (0.89-1.17) | 0.79 |
| rs735951   | 1 | 0.81 (0.63-1.05) | 1.06 (0.85-1.32) | 1.00 (0.72-1.39) | 0.95 (0.73-1.25) | 0.95 (0.66-1.35) | 1.00 (0.72-1.39) | 0.00 | 0.96 (0.86-1.08) | 0.50 |
| rs735951   | 2 | 0.80 (0.61-1.04) | 1.06 (0.84-1.34) | 1.00 (0.71-1.40) | 0.94 (0.72-1.24) | NA               | NA               | 0.00 | 0.95 (0.83-1.09) | 0.45 |
| rs735951   | 3 | NA               | 1.08 (0.85-1.36) | 0.99 (0.71-1.39) | 0.94 (0.71-1.24) | NA               | NA               | 0.00 | 1.01 (0.86-1.19) | 0.88 |
| rs735951   | 4 | 0.79 (0.60-1.03) | 1.10 (0.87-1.39) | 1.02 (0.73-1.43) | 0.98 (0.74-1.29) | NA               | NA               | 0.16 | 0.97 (0.84-1.11) | 0.62 |
| rs37062    | 1 | 1.02 (0.77-1.34) | 0.95 (0.74-1.20) | 1.03 (0.72-1.49) | 1.06 (0.78-1.45) | 1.27 (0.85-1.90) | 0.97 (0.66-1.43) | 0.00 | 1.03 (0.90-1.16) | 0.71 |
| rs37062    | 2 | 1.06 (0.80-1.41) | 0.94 (0.73-1.21) | 0.96 (0.67-1.39) | 1.05 (0.77-1.43) | NA               | NA               | 0.00 | 1.00 (0.86-1.16) | 0.99 |
| rs37062    | 3 | NA               | 0.95 (0.74-1.23) | 0.98 (0.68-1.42) | 1.06 (0.78-1.46) | NA               | NA               | 0.00 | 0.99 (0.83-1.18) | 0.92 |
| rs37062    | 4 | 1.06 (0.79-1.41) | 0.93 (0.72-1.20) | 0.98 (0.68-1.42) | 1.01 (0.74-1.37) | NA               | NA               | 0.00 | 0.99 (0.85-1.15) | 0.87 |
| rs17779747 | 1 | 0.81 (0.60-1.09) | 1.04 (0.82-1.32) | 1.03 (0.71-1.49) | 0.84 (0.62-1.15) | 0.95 (0.62-1.43) | 1.05 (0.74-1.47) | 0.00 | 0.95 (0.83-1.08) | 0.42 |
| rs17779747 | 2 | 0.90 (0.67-1.22) | 1.02 (0.79-1.32) | 1.02 (0.70-1.48) | 0.88 (0.64-1.20) | NA               | NA               | 0.00 | 0.96 (0.82-1.11) | 0.55 |
| rs17779747 | 3 | NA               | 1.04 (0.80-1.34) | 0.99 (0.69-1.44) | 0.86 (0.63-1.19) | NA               | NA               | 0.00 | 0.97 (0.81-1.16) | 0.74 |
| rs17779747 | 4 | 0.91 (0.67-1.23) | 1.02 (0.78-1.32) | 0.97 (0.67-1.40) | 0.87 (0.63-1.20) | NA               | NA               | 0.00 | 0.95 (0.81-1.10) | 0.47 |
| rs1805128  | 1 | 0.89 (0.37-2.16) | 0.71 (0.29-1.72) | 0.89 (0.22-3.59) | 1.11 (0.35-3.51) | 0.52 (0.07-2.33) | 1.00 (0.14-4.86) | 0.00 | 0.84 (0.53-1.34) | 0.46 |
| rs1805128  | 2 | 0.93 (0.39-2.23) | 0.71 (0.26-1.90) | 1.00 (0.25-4.10) | 1.06 (0.33-3.39) | NA               | NA               | 0.00 | 0.89 (0.53-1.52) | 0.68 |
| rs1805128  | 3 | NA               | 0.66 (0.24-1.78) | 1.04 (0.25-4.25) | 1.12 (0.35-3.57) | NA               | NA               | 0.00 | 0.87 (0.45-1.69) | 0.67 |
| rs1805128  | 4 | 0.90 (0.37-2.17) | 0.69 (0.25-1.85) | 1.05 (0.26-4.30) | 1.19 (0.37-3.78) | NA               | NA               | 0.00 | 0.90 (0.53-1.53) | 0.70 |
| rs727957   | 1 | 0.93 (0.67-1.29) | 0.93 (0.71-1.23) | 0.89 (0.57-1.41) | 0.71 (0.48-1.07) | 0.96 (0.60-1.52) | 1.11 (0.73-1.67) | 0.00 | 0.92 (0.79-1.07) | 0.26 |
| rs727957   | 2 | 0.92 (0.66-1.29) | 0.91 (0.67-1.23) | 0.94 (0.59-1.51) | 0.65 (0.43-0.98) | NA               | NA               | 0.00 | 0.86 (0.72-1.03) | 0.10 |
| rs727957   | 3 | NA               | 0.93 (0.68-1.25) | 0.95 (0.59-1.51) | 0.66 (0.44-1.01) | NA               | NA               | 0.00 | 0.85 (0.69-1.06) | 0.14 |
| rs727957   | 4 | 0.91 (0.65-1.28) | 0.93 (0.69-1.26) | 0.96 (0.60-1.54) | 0.66 (0.44-1.00) | NA               | NA               | 0.00 | 0.87 (0.73-1.05) | 0.14 |

Model 1: Age was used as the time scale and sex and geographic region were adjusted for. For HSDS and TASTY, age at death and sex were adjusted for. Model 2: Sex, geographic region, HDL-total cholesterol ratio, systolic blood pressure, prevalent diabetes, BMI, current and former smoking status, physical activity, and prevalent CHD were adjusted for. Model 3: Adjustments as in model 2 + QT-prolonging and QT-shortening drug use. Model 4: Adjustments as in model 2 + prevalent heart failure. Model 5 for rs2200733: Adjustments as in model 2 + atrial fibrillation. BMI = body mass index, CHD = coronary heart disease, CI = confidence interval, HDL = high-density lipoprotein cholesterol, HR = hazard ratio (in Cox regression), HSDS = The Helsinki Sudden Death Study,  $I^2$  = measure of heterogeneity between studies, OR = odds ratio (in logistic regression), RR = relative risk, SNP = single nucleotide polymorphism, TASTY = The Tampere Autopsy Study.

\*Random-effects meta-analysis was used because of significant heterogeneity between studies.
