# Supplementary material for: Common Genetic Variants Associated with Sudden Cardiac Death: The FinSCDgen Study
Source: PLoS One. 2012 Jul 23;7(7):e41675. doi: 10.1371/journal.pone.0041675 (PMC3402479; doi:10.1371/journal.pone.0041675)
Supplement: Table S3 — QT-prolonging medication according to the website http://www.qtdrugs.org/ . (PDF) [file pone.0041675.s004.pdf]

**Table S3. QT-prolonging medication according to the website <http://www.qtdrugs.org/>.**

| <b>Risk class</b>                | <b>Generic name</b> | <b>ATC codes</b>                   |
|----------------------------------|---------------------|------------------------------------|
| Definite<br>(revised 03/25/2008) | Amiodarone          | C01BD01                            |
|                                  | Arsenic trioxide    | L01XX27                            |
|                                  | Astemizole          | R06AX11                            |
|                                  | Bepiridil           | C08EA02                            |
|                                  | Chloroquine         | P01BA01                            |
|                                  | Chlorpromazine      | N05AA01                            |
|                                  | Cisapride           | A03FA02                            |
|                                  | Clarithromycin      | J01FA09, A02BD04, A02BD05, A02BD06 |
|                                  | Disopyramide        | C01BA03                            |
|                                  | Dofetilide          | C01BD04                            |
|                                  | Domperidone         | A03FA03                            |
|                                  | Droperidol          | N05AD08, N01AX01                   |
|                                  | Erythromycin        | J01FA01                            |
|                                  | Halofantrine        | P01BX01                            |
|                                  | Haloperidol         | N05AD01                            |
|                                  | Ibutilide           | C01BD05                            |
|                                  | Levomethadyl        | N07BC03                            |
|                                  | Mesoridazine        | N05AC03                            |
|                                  | Methadone           | N07BC02, N02AC52                   |
|                                  | Pentamidine         | P01CX01                            |
|                                  | Pimozide            | N05AG02                            |
|                                  | Probucol            | C10AX02                            |
|                                  | Procainamide        | C01BA02                            |
|                                  | Quinidine           | C01BA01, C01BA51, C01BA71          |
|                                  | Sotalol             | C07AA07, C07AA57, C07BA07          |
|                                  | Sparfloxacin        | J01MA09                            |
|                                  | Terfenadine         | R06AX12                            |
|                                  | Thioridazine        | N05AC02                            |
| Possible<br>(revised 04/15/2009) | Alfuzosin           | G04CA01                            |
|                                  | Amantadine          | N04BB01                            |
|                                  | Atazanavir          | J05AE08                            |
|                                  | Azithromycin        | J01FA10                            |
|                                  | Chloral hydrate     | N05CC01, N05CC03                   |
|                                  | Clozapine           | N05AH02                            |
|                                  | Dolasetron          | A04AA04                            |
|                                  | Felbamate           | N03AX10                            |
|                                  | Flecainide          | C01BC04                            |
|                                  | Foscarnet           | J05AD01                            |
|                                  | Fosphenytoin        | N03AB05                            |
|                                  | Gatifloxacin        | J01MA16                            |
|                                  | Gemifloxacin        | J01MA15                            |
|                                  | Granisetron         | A04AA02                            |
|                                  | Indapamide          | C03BA11                            |
|                                  | Isradipine          | C08CA03                            |
|                                  | Lapatinib           | L01XE07                            |
|                                  | Levofloxacin        | J01MA12                            |

|                                     |                               |                           |
|-------------------------------------|-------------------------------|---------------------------|
| Conditional<br>(revised 07/24/2009) | Lithium                       | N05AN01                   |
|                                     | Moexipril/HCTZ                | C09BA13                   |
|                                     | Moxifloxacin                  | J01MA14                   |
|                                     | Nicardipine                   | C08CA04                   |
|                                     | Nilotinib                     | L01XE08                   |
|                                     | Octreotide                    | H01CB02                   |
|                                     | Ofloxacin                     | J01MA01                   |
|                                     | Ondansetron                   | A04AA01                   |
|                                     | Oxytocin                      | H01BB02, G02AC01, H01BB01 |
|                                     | Paliperidone                  | N05AX13                   |
|                                     | Perflutren Lipid Microspheres |                           |
|                                     | Quetiapine                    | N05AH04                   |
|                                     | Ranolazine                    | C01EB18                   |
|                                     | Risperidone                   | N05AX08                   |
|                                     | Roxithromycin                 | J01FA06                   |
|                                     | Sertindole                    | N05AE03                   |
|                                     | Sunitinib                     | L01XE04                   |
|                                     | Tacrolimus                    | L04AD02                   |
|                                     | Tamoxifen                     | L02BA01                   |
|                                     | Telithromycin                 | J01FA15                   |
|                                     | Tizanidine                    | M03BX02                   |
|                                     | Vardenafil                    | G04BE09                   |
|                                     | Venlafaxine                   | N06AX16, N06AX23          |
|                                     | Voriconazole                  | J02AC03                   |
|                                     | Ziprasidone                   | N05AE04                   |
|                                     | Amitriptyline                 | N06AA09, N06CA01          |
|                                     | Ciprofloxacin                 | J01MA02                   |
|                                     | Citalopram                    | N06AB04, N06AB10          |
|                                     | Clomipramine                  | N06AA04                   |
|                                     | Desipramine                   | N06AA01                   |
|                                     | Diphenhydramine               | R06AA02, R06AA52          |
|                                     | Doxepin                       | N06AA12                   |
|                                     | Fluconazole                   | J02AC01                   |
|                                     | Fluoxetine                    | N06AB03                   |
|                                     | Galantamine                   | N06DA04                   |
|                                     | Imipramine                    | N06AA02, N06AA03          |
|                                     | Itraconazole                  | J02AC02                   |
|                                     | Ketoconazole                  | J02AB02                   |
|                                     | Mexiletine                    | C01BB02                   |
|                                     | Nortriptyline                 | N06AA10                   |
|                                     | Paroxetine                    | N06AB05                   |
|                                     | Protriptyline                 | N06AA11                   |
|                                     | Sertraline                    | N06AB06                   |
|                                     | Solifenacin                   | G04BD08                   |
|                                     | Trimethoprim-Sulfa            | J01EE01                   |
|                                     | Trimipramine                  | N06AA06                   |

---

ATC = Anatomical Therapeutic Chemical classification.
