# Supplementary material for: Common Genetic Variants Associated with Sudden Cardiac Death: The FinSCDgen Study
Source: PLoS One. 2012 Jul 23;7(7):e41675. doi: 10.1371/journal.pone.0041675 (PMC3402479; doi:10.1371/journal.pone.0041675)
Supplement: Table S6 — SNP information for QTscore calculation. (PDF) [file pone.0041675.s007.pdf]

**Table S6. SNP information for QT<sub>score</sub> calculation.**

| SNP        | Chr | Position    | Nearest gene         | Coded allele | AF   | Effect (ms) |
|------------|-----|-------------|----------------------|--------------|------|-------------|
| rs846111   | 1p  | 6,201,957   | <i>RNF207</i>        | C            | 0.26 | 1.7         |
| rs12143842 | 1q  | 160,300,514 | <i>NOS1AP</i>        | T            | 0.25 | 3.5         |
| rs10919071 | 1q  | 167,366,107 | <i>ATP1B1</i>        | G            | 0.11 | -1.8        |
| rs12053903 | 3p  | 38,568,397  | <i>SCN5A</i>         | C            | 0.41 | -1.1        |
| rs12210810 | 6q  | 118,759,897 | <i>SLC35F1 / PLN</i> | C            | 0.03 | -2.8        |
| rs4725982  | 7q  | 150,268,796 | <i>KCNH2</i>         | T            | 0.29 | 1.5         |
| rs2074238  | 11p | 2,441,379   | <i>KCNQ1</i>         | T            | 0.09 | -5.0        |
| rs12576239 | 11p | 2,458,895   | <i>KCNQ1</i>         | T            | 0.16 | 1.9         |
| rs735951   | 16p | 11,601,037  | <i>LITAF</i>         | A            | 0.42 | -1.2        |
| rs37062    | 16q | 57,124,739  | <i>CNOT1</i>         | G            | 0.27 | -1.9        |
| rs17779747 | 17q | 66,006,587  | <i>KCNJ2</i>         | T            | 0.25 | -1.1        |
| rs1805128  | 21q | 34,743,550  | <i>KCNE1</i>         | T            | 0.02 | 8.4         |

The QT<sub>score</sub> SNPs were selected to represent independent signals with genome-wide significant association with QT interval [1,2]. The QT<sub>score</sub> was calculated based on previously reported effect estimates [1,2]:  $QT_{score} = [(SNP1 \text{ allele copy number}) \times (SNP1 \text{ effect estimate in predicted ms})] + [(SNP2 \text{ allele copy number}) \times (SNP2 \text{ effect estimate in predicted ms})] + \dots$  through SNP12. For each individual, <40% of the QT<sub>score</sub> SNPs were allowed to be missing. Missing QT<sub>score</sub> SNP genotypes were imputed separately in each study using the formula: allele copy number = 2 x coded allele frequency [3]. Coded alleles refer to the allele coded 0,1,2 with reference to the positive strand of the reference sequence of the human genome—NCBI build 36.1. AF = coded allele frequency, Chr = chromosome, ms = millisecond, SNP = single nucleotide polymorphism.

References:

1. Newton-Cheh C, Eijgelsheim M, Rice KM, de Bakker PI, Yin X, et al. (2009) Common variants at ten loci influence QT interval duration in the QTGEN Study. *Nat Genet* 41: 399-406.
2. Pfeufer A, Sanna S, Arking DE, Müller M, Gateva V, et al. (2009) Common variants at ten loci modulate the QT interval duration in the QTSCD Study. *Nat Genet* 41: 407-414.
3. Purcell S, Neale B, Todd-Brown K, Thomas L, Ferreira MA, et al. (2007) PLINK: a tool set for whole-genome association and population-based linkage analyses. *Am J Hum Genet* 81: 559-575.
