# Supplementary material for: Common Genetic Variants Associated with Sudden Cardiac Death: The FinSCDgen Study
Source: PLoS One. 2012 Jul 23;7(7):e41675. doi: 10.1371/journal.pone.0041675 (PMC3402479; doi:10.1371/journal.pone.0041675)
Supplement: Table S8 — Association of QTscore with SCD. (PDF) [file pone.0041675.s009.pdf]

**Table S8. Association of QT<sub>score</sub> with SCD.**

| SNP                                                       | Population cohorts, HR (95% CI)* |                  |                  | Autopsy studies, OR (95% CI) <sup>†</sup> |                  |                  | Fixed-effects meta-analysis |                  |         |
|-----------------------------------------------------------|----------------------------------|------------------|------------------|-------------------------------------------|------------------|------------------|-----------------------------|------------------|---------|
|                                                           | FINRISK 1992                     | FINRISK 1997     | FINRISK 2002     | Health 2000                               | HSDS             | TASTY            | I <sup>2</sup>              | RR (95% CI)      | P-value |
| Linear QT <sub>score</sub>                                | 0.99 (0.95-1.03)                 | 1.01 (0.98-1.04) | 0.98 (0.93-1.04) | 1.03 (0.99-1.08)                          | 0.99 (0.93-1.04) | 1.04 (0.98-1.10) | 0.00                        | 1.01 (0.99-1.02) | 0.61    |
| QT <sub>score</sub> 1 <sup>st</sup> quintile <sup>‡</sup> | 1.39 (0.79-2.45)                 | 0.66 (0.42-1.04) | 1.46 (0.69-3.08) | 1.01 (0.51-2.03)                          | 0.74 (0.35-1.57) | 0.68 (0.32-1.42) | 0.24                        | 0.91 (0.70-1.17) | 0.45    |
| QT <sub>score</sub> 2 <sup>nd</sup> quintile <sup>‡</sup> | 1.49 (0.85-2.62)                 | 0.65 (0.41-1.03) | 1.27 (0.59-2.71) | 1.29 (0.67-2.47)                          | 0.63 (0.29-1.35) | 0.64 (0.30-1.33) | 0.42                        | 0.92 (0.71-1.18) | 0.51    |
| QT <sub>score</sub> 4 <sup>th</sup> quintile <sup>‡</sup> | 1.27 (0.72-2.25)                 | 0.92 (0.61-1.40) | 1.47 (0.71-3.04) | 1.78 (0.97-3.26)                          | 0.71 (0.33-1.52) | 1.04 (0.51-2.12) | 0.05                        | 1.13 (0.89-1.44) | 0.32    |
| QT <sub>score</sub> 5 <sup>th</sup> quintile <sup>‡</sup> | 1.03 (0.57-1.86)                 | 0.70 (0.44-1.11) | 1.15 (0.53-2.53) | 1.62 (0.87-3.02)                          | 0.58 (0.26-1.24) | 1.06 (0.52-2.13) | 0.23                        | 0.94 (0.73-1.22) | 0.65    |

CI = confidence interval, HR = hazard ratio (in Cox regression), HSDS = The Helsinki Sudden Death Study, I<sup>2</sup> = measure of heterogeneity between studies, OR = odds ratio (in logistic regression), RR = relative risk, TASTY = The Tampere Autopsy Study.

\*Age was used as time scale and sex and geographic region were adjusted for.

<sup>†</sup>Age at death and sex were adjusted for.

<sup>‡</sup>Third quintile used as reference.
